# Supplementary material for: Transparent nanocellulose hybrid films functionalized with ZnO nanostructures for UV-blocking
Source: Royal Society of Chemistry journal article supplement (doi:10.1039/c5tc00812c), 2015-01-01
Supplement: c5tc00812c1.pdf [file c5tc00812c1.pdf]

## **Electronic Supplementary Information**

### **Transparent nanocellulose hybrid films functionalized with ZnO nanostructures for UV-blocking**

**Yaoquan Jiang,<sup>a</sup> Yuanyuan Song,<sup>b</sup> Miao Miao,<sup>a</sup> Shaomei Cao,<sup>a</sup> Xin Feng,<sup>\*a,b</sup> Jianhui Fang<sup>c</sup> and Liyi Shi<sup>a</sup>**

<sup>a</sup> Research Center of Nano Science and Technology, Shanghai University, Shanghai 200444, P. R. China. Fax: 86-21-66136038; Tel: 86-21-66137257; E-mail: [fengxin@shu.edu.cn](mailto:fengxin@shu.edu.cn)

<sup>b</sup> School of Materials Sciences and Engineering, Shanghai University, Shanghai 200444, P. R. China.

<sup>c</sup> Department of Chemistry, Shanghai University, Shanghai 200444, P. R. China.

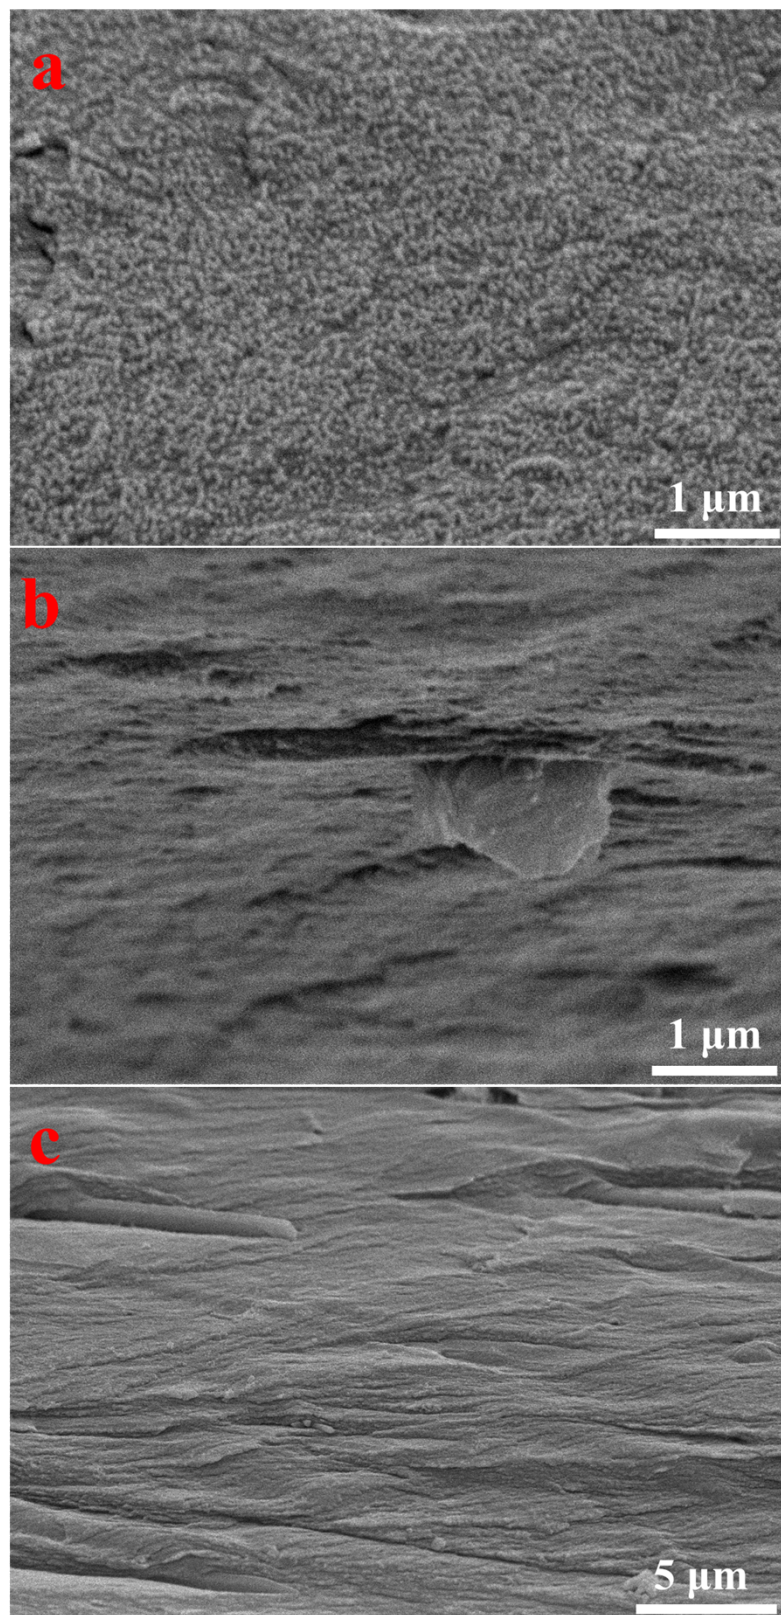

**Figure S1.** SEM images of the cross-section of NC film (a), NC/s-ZnO<sub>4</sub> (b) and NC/b-ZnO<sub>4</sub> hybrid film (c).

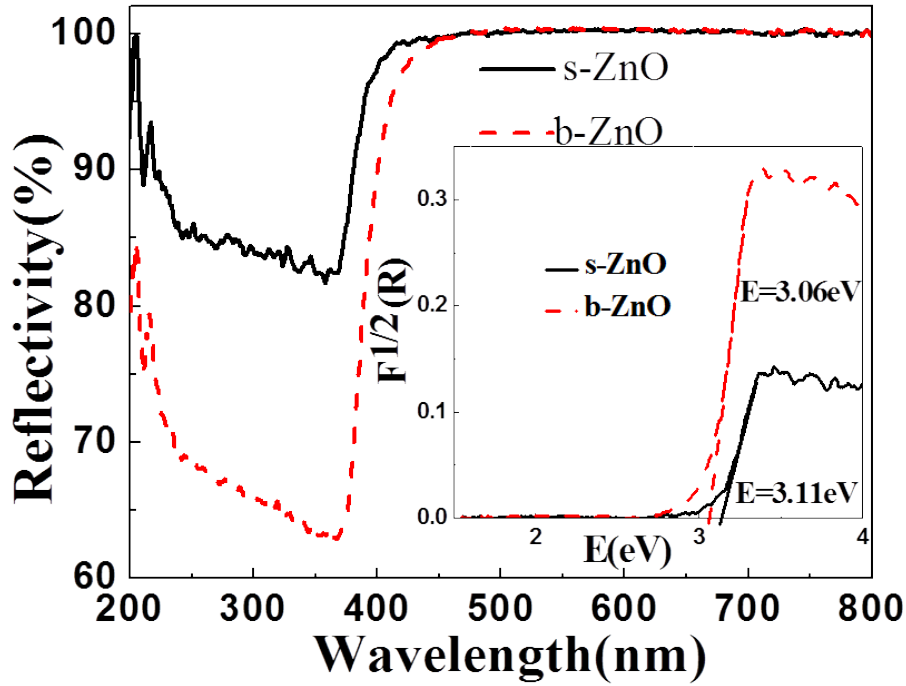

**Figure S2.** The solid diffuse reflection UV-vis spectra of s-ZnO (solid line) and b-ZnO (dash line).

Solid diffuse reflection UV-vis spectra were measured in air at the wavelength range of 200~800 nm. The reflectance data was converted to the absorption coefficient  $F(R)$  values according to the Kubelka-Munk radiative transfer model, as reflected in Figure S2. The band gap energy ( $E_g$ ) of the samples was obtained according to the following equation (1):

$$F(R) = (1-R)^2/2R \quad (1)$$

Here,  $R$  is fractional reflectance,  $F(R)$  is the absorption coefficient. The  $E_g$  values were determined as 3.06 and 3.11 eV for s-ZnO and b-ZnO by making the tangential line of the  $F1/2(R)$ - $E_g$  curve to inset with the horizontal axis, respectively. The s-ZnO reflectance blue-shifted about 50 meV compared to b-ZnO as shown in the onset of Figure S2. The solid diffuse reflection UV-vis results showed that the obtained ZnO owned a much higher reflectivity than the previous prepared ZnO.<sup>S1,S2</sup> For an interesting finding was that the s-ZnO possessed a better UV reflection compared to the b-ZnO, which corresponded to the evidence of NC/s-ZnO hybrid films had a higher UV-blocking Ratio.

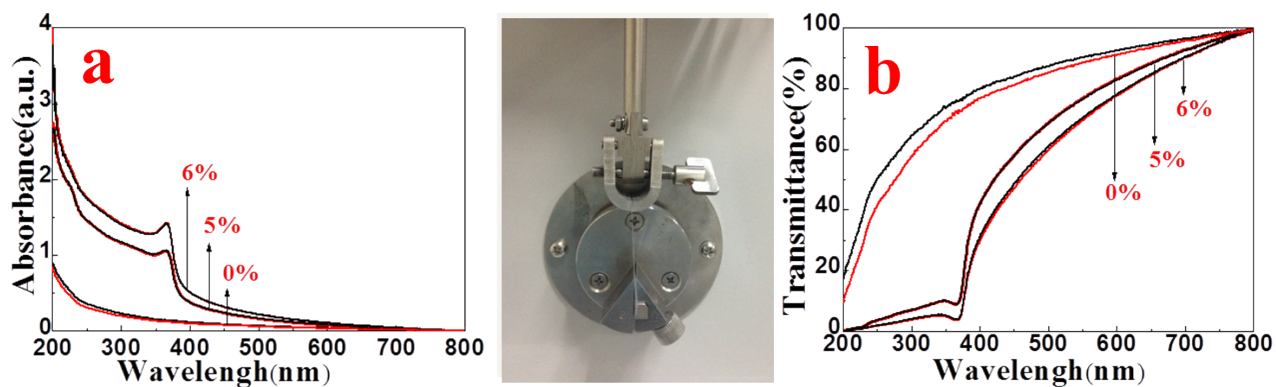

**Figure S3.** UV-vis spectra of NC/s-ZnO (a, b) hybrid films before (Black curves) and after bending for 200 times (Red curves).

**Table S1.** Photo-degradation results of NC/s-ZnO hybrid films under UV irradiation.

|           | Before UV irradiated<br>(g) | UV irradiated for 24<br>h (g) | UV irradiated for 48 h<br>(g) | UV irradiated for 72 h<br>(g) |
|-----------|-----------------------------|-------------------------------|-------------------------------|-------------------------------|
| NC/ZnO0   | 0.0334                      | 0.0333                        | 0.0331                        | 0.0330                        |
| NC/s-ZnO1 | 0.0354                      | 0.0351                        | 0.0350                        | 0.0351                        |
| NC/s-ZnO2 | 0.0347                      | 0.0343                        | 0.0344                        | 0.0344                        |
| NC/b-ZnO1 | 0.0333                      | 0.0333                        | 0.0332                        | 0.0330                        |
| NC/b-ZnO2 | 0.0338                      | 0.0335                        | 0.0336                        | 0.0334                        |

S1 P. Dolcet, F. Latini, M. Casarin, et al., Eur. J. Inorg. Chem., 2013, **13**, 2291.

S2 R. Dharmadasa, A. A. Tahir, K. G. U. Wijayantha, et al., J. Am. Ceram. Soc., 2011, **94**, 3540
